# Supplementary material for: Association Between Health Literacy, eHealth Literacy, and Health Outcomes Among Patients With Long-Term Conditions
Source: Atypon-hosted journal article supplement (doi:10.1027/1016-9040/a000350), 2019-01-01
Supplement: 1016-9040_a000350_esm1.pdf [file 1016-9040_a000350_esm1.pdf]

Table 1. Synthesis of reviews (2004, 2011) and new literature search (2011-2016) on health literacy and outcome among patients with long term conditions

| Outcome variable                  | Source; long term condition                  | Literacy relationship: Pos/Neg/No | Quality of studies; Design, N, measure   | Number of studies with a significant association of health literacy with outcome variable |
|-----------------------------------|----------------------------------------------|-----------------------------------|------------------------------------------|-------------------------------------------------------------------------------------------|
| <b><i>Patient outcomes</i></b>    |                                              |                                   |                                          |                                                                                           |
| <b><i>Clinical indicators</i></b> |                                              |                                   |                                          | 13/31                                                                                     |
| CD4 count, viral load             | (Kalichman & Rompa, 2000); HIV               | No                                | Fair; cross sectional, n=339, TOFHLA     | 1/4                                                                                       |
| CD4 count                         | (Mayben et al., 2007); HIV                   | No                                | Fair; cross sectional, n=119, TOFHLA     |                                                                                           |
| HIV - Viral load                  | (Paasche-Orlow et al., 2006); HIV            | No                                | Fair; retrospective cohort, n=235, REALM |                                                                                           |
|                                   | (Pellowski, Kalichman, & Grebler, 2016); HIV | Positive                          | Good; prospective, n=188, TOFHLA         |                                                                                           |
| HIV symptoms severity             | (Nokes et al., 2007); HIV                    | Positive                          | Fair; cross sectional, n=489, REALM      | 1/1                                                                                       |
| Glycemic control                  | (Schillinger et al., 2002); diabetes         | Positive                          | Good; cross sectional, n=408, s-TOFHLA   | 4/8                                                                                       |
|                                   | (Powell, Hill, & Clancy, 2007); diabetes     | Positive                          | Fair; cross sectional, n=68, REALM       |                                                                                           |

|                                                         |                                                              |          |                                                         |
|---------------------------------------------------------|--------------------------------------------------------------|----------|---------------------------------------------------------|
|                                                         | (Schillinger, Barton, Karter, Wang, & Adler, 2006); diabetes | Positive | Good; cross sectional, n=395, s-TOFHLA                  |
|                                                         | (Osborn, Bains, & Egede, 2010); diabetes                     | No       | Fair; cross-sectional, n=125, REALM                     |
|                                                         | (Mancuso, 2010); diabetes                                    | No       | Good; cross sectional, n=102, TOFHLA                    |
|                                                         | (Brega et al., 2012); Diabetes                               | No       | Fair; retrospective, n=594, 3 self-reported items       |
|                                                         | (Ishikawa & Yano, 2011); diabetes                            | Positive | Good; prospective cohort, n=143, 5 self-reported items  |
|                                                         | (Lai, Ishikawa, Kiuchi, Mooppil, & Griva, 2013); diabetes    | No       | Fair; cross sectional, n=63, 5 self-reported items      |
| Glycemic control, blood pressure, BMI                   | (Al Sayah et al., 2015); diabetes                            | No       | Fair; cross sectional, n=343, 3 self-reported items 1/4 |
| Glycemic control, blood pressure, lipids                | (Sayah, Majumdar, & Johnson, 2015); diabetes                 | No       | Good; prospective, n=154, 3 self-reported items         |
| Glycemic control, blood pressure, lipids, complications | (Morris, MacLean, & Littenberg, 2006); diabetes              | No       | Good; cross sectional, n=1002, s-TOFHLA                 |
| Glycemic control & less complications                   | (Tang, Pang, Chan, Yeung, & Yeung, 2008); diabetes           | Positive | Fair; cross sectional, n=149, s-TOFHLA                  |

|                                |                                                                        |          |                                                      |     |
|--------------------------------|------------------------------------------------------------------------|----------|------------------------------------------------------|-----|
| Anti-coagulation control       | (Estrada, Martin-Hryniewicz, Peek, Collins, & Byrd, 2004); coagulation | Positive | Fair; prospective cohort, n=143, REALM               | 2/3 |
|                                | (Fang, Machtinger, Wang, & Schillinger, 2006); coagulation             | No       | Fair; cross sectional, n=179, s-TOFHLA               |     |
|                                | (Oramasionwu et al., 2014); coagulation                                | Positive | Fair; cross sectional, n=198                         |     |
| Cancer stage                   | (C. L. Bennett et al., 1998); cancer                                   | No       | Good; cross sectional, n=212, REALM                  | 0/2 |
|                                | (Halverson et al., 2013); cancer                                       | No       | Good; cross sectional, n=1841, 4 self-reported items |     |
| Blood pressure and b-p control | (Pellowski et al., 2016); HIV                                          | Positive | Good; prospective, n=188, TOFHLA                     | 2/4 |
|                                | (Pandit et al., 2009); hypertension                                    | Positive | Fair; cross sectional, n=330, s-TOFHLA               |     |
|                                | (Al Sayah et al., 2015); diabetes                                      | No       | Fair; cross sectional, n=343, 3 self-reported items  |     |
|                                | (Halladay et al., 2016); hypertension                                  | No       | Good; prospective cohort, n=525, s-TOFHLA            |     |
| Infections                     | (Jain, Sheth, Green, Bender, & Weisbord,                               | No       | Fair; cross sectional, n=32, REALM                   | 1/2 |

|                                        |                                                                 |                                 |                                                     |       |
|----------------------------------------|-----------------------------------------------------------------|---------------------------------|-----------------------------------------------------|-------|
|                                        | 2015); peritoneal dialysis<br>(renal disease)                   |                                 |                                                     |       |
| Kidney function (eGFR)                 | (Devraj et al., 2015); renal disease                            | Positive, small and not stable. | Fair; cross sectional, n=150, NVS                   |       |
| Graft failure                          | (Miller-Matero et al., 2016); transplantation                   | Negative                        | Fair; retrospective cohort, n=398, REALM            | 1/1   |
| Complication (minor) following surgery | (Scarpato et al., 2016); cystectomy                             | Negative                        | Fair; cross sectional, n=368, 3 self-reported items | 1/2   |
| Complication (major) following surgery | (Scarpato et al., 2016); cystectomy                             | No                              | Fair; cross sectional, n=368, 3 self-reported items |       |
| <i>Function and health status</i>      |                                                                 |                                 |                                                     | 12/17 |
| <i>SRH</i>                             | (Cho, Lee, Arozullah, & Crittenden, 2008); Elderly              | Positive                        | Fair; cross sectional, n=489, s-TOFHLA              | 5/8   |
|                                        | (Kalichman & Rompa, 2000); HIV                                  | No                              | Fair; cross sectional, n=339, TOFHLA                |       |
|                                        | (Gordon, Hampson, Capell, & Madhok, 2002); Rheumatoid arthritis | No                              | Fair; cross sectional, n=123, REALM                 |       |
|                                        | (I. Bennett & Chen, 2009); Elderly                              | Positive                        | Good; cross sectional, n=2668, NAAL                 |       |
|                                        | (Howard, Sentell, & Gazmararian, 2006); Elderly                 | Positive                        | Fair; cohort, n=3260, TOFHLA                        |       |

|                          |                                                                       |          |                                           |     |
|--------------------------|-----------------------------------------------------------------------|----------|-------------------------------------------|-----|
|                          | (S.-Y. D. Lee, Arozullah, Cho, Crittenden, & Vicencio, 2009); Elderly | Positive | Fair; cross sectional, n=489, s- TOFHLA   |     |
|                          | (Smith, Curtis, Wardle, von Wagner, & Wolf, 2013); Elderly            | Positive | Fair; cross sectional, n=697, TOFHLA      |     |
|                          | (Hahn et al., 2015); diabetes                                         | No       | Fair; cross sectional, n=295, Health LiTT |     |
| SRH and less limitations | (Kim, 2009); Elderly                                                  | Positive | Fair; cross sectional, n=103, TOFHLA      | 4/5 |
|                          | (Mancuso & Rincon, 2006); Asthma                                      | No       | Fair; cross sectional, n=175, TOFHLA      |     |
|                          | (Wolf, Gazmararian, & Baker, 2005); Elderly                           | Positive | Fair; cross sectional, n=3260, s-TOFHLA   |     |
|                          | (Zhang, Li, Fong, & Thumboo, 2009); Rheumatoid arthritis              | Positive | Fair; cross sectional, n=199, REALM       |     |
|                          | (Puente-Maestu et al., 2016); COPD                                    | Positive | Good; prospective cohort, n=296, SAHLSA   |     |
| Function improvement     | (Sperber et al., 2013), 2013; osteoarthritis                          | No       | Fair; prospective RCT; n=515, REALM       | 0/1 |
| Pain improvement         | (Sperber et al., 2013); osteoarthritis                                | Negative | Fair; prospective RCT; n=515, REALM       | 1/1 |

|                                              |                                                              |                             |                                                     |      |
|----------------------------------------------|--------------------------------------------------------------|-----------------------------|-----------------------------------------------------|------|
| Morbidity                                    | (Johnston, Diab, Kim, & Kirshblum, 2005); spinal cord injury | Negative                    | Fair; cross sectional, n=107, TOFHLA                | 2/2  |
|                                              | (Puente-Maestu et al., 2016); COPD                           | Negative                    | Good; prospective cohort, n=296, SAHLSA             |      |
| <i>Quality of Life, emotional conditions</i> |                                                              |                             |                                                     | 7/17 |
| Depression                                   | (Kalichman et al., 2000); HIV                                | Negative                    | Fair; cross sectional, n=297, TOFHLA                | 4/7  |
|                                              | (J. Gazmararian, Baker, Parker, & Blazer, 2000); Elderly     | No                          | Good; cross sectional, n=2923, s- TOFHLA            |      |
|                                              | (Lincoln et al., 2006); Adults with addiction                | Negative                    | Fair; prospective cohort, n=380, REALM              |      |
|                                              | (Nokes et al., 2007); HIV                                    | Positive                    | Fair; cross sectional, n=489, REALM                 |      |
|                                              | (Al Sayah et al., 2015); diabetes                            | Negative                    | Fair; cross sectional, n=343, 3 self-reported items |      |
|                                              | (Sayah et al., 2015); diabetes                               | No                          | Good; prospective, n=154, 3 self-reported items     |      |
|                                              | (Smith et al., 2013); Elderly                                | Negative                    | Fair; cross sectional, n=697                        |      |
| Anxiety, depression                          | (Gordon et al., 2002); Rheumatoid arthritis                  | Negative, only with anxiety | Fair; cross sectional, n=123, REALM                 | 3/3  |

|                                     |                                                        |          |                                                                                        |     |
|-------------------------------------|--------------------------------------------------------|----------|----------------------------------------------------------------------------------------|-----|
|                                     | (Walker et al., 2007);<br>Rheumatoid arthritis         | Negative | Fair; cross sectional, n=363,<br>REALM                                                 |     |
|                                     | (Puente-Maestu et al.,<br>2016); COPD                  | Negative | Good; prospective cohort,<br>n=296, SAHLSA                                             |     |
| Quality of Life                     | (Lincoln et al., 2006);<br>Adults with addiction       | No       | Fair; prospective cohort,<br>n=380, REALM                                              | 0/7 |
|                                     | (C. A. Mancuso & Rincon,<br>2006); Asthma              | No       | Fair; cross sectional, n=175,<br>TOFHLA                                                |     |
|                                     | (Hahn et al., 2007); cancer                            | No       | Good; cross sectional,<br>n=415, Health LiTT                                           |     |
|                                     | (Zhang et al., 2009);<br>Rheumatoid arthritis          | No       | Fair; cross sectional, n=199,<br>REALM                                                 |     |
|                                     | (E.-H. Lee, Lee, & Moon,<br>2016); diabetes            | No       | Fair; cross sectional, n=459,<br>self-constructed health<br>literacy scale in Japanese |     |
|                                     | (Al Sayah et al., 2015);<br>diabetes                   | No       | Good; prospective, n=154, 3<br>self-reported items                                     |     |
| Quality of Life, vision-<br>related | (Muir et al., 2008);<br>glaucoma                       | No       | Fair; cross sectional, n=195,<br>REALM                                                 |     |
| <i>Mortality (Elderly)</i>          | (Baker et al., 2007);<br>Elderly                       | Negative | Good; prospective cohort,<br>n=3260, s-TOFHLA                                          | 4/4 |
|                                     | (Baker, Wolf, Feinglass, &<br>Thompson, 2008); Elderly | Negative | Good; prospective cohort,<br>n=3260, s-TOFHLA                                          |     |

|                                   |                                                       |          |                                              |       |
|-----------------------------------|-------------------------------------------------------|----------|----------------------------------------------|-------|
|                                   | (Sudore, Yaffe, et al., 2006); Elderly                | Negative | Good; prospective cohort, n=2512, REALM      |       |
|                                   | (Puente-Maestu et al., 2016); COPD                    | Negative | Good; prospective cohort, n=296, SAHLSA      |       |
| <b><i>Process of Care</i></b>     |                                                       |          |                                              |       |
| Medication adherence & management | (Kalichman & Rompa, 2000); HIV                        | No       | Fair; cross sectional, n=339, TOFHLA         | 14/20 |
|                                   | (Kalichman, Ramachandran, & Catz, 1999); HIV          | Positive | Good; cross sectional, n=182, adapted TOFHLA |       |
|                                   | (Cho et al., 2008); Elderly                           | Positive | Fair; cross sectional, n=489, s-TOFHLA       |       |
|                                   | (Kripalani et al., 2006); CVD                         | Positive | Good; cross sectional, n=152, REALM          |       |
|                                   | (Waldrop-Valverde et al., 2009); HIV                  | Positive | Fair; cross sectional, n=155, TOFHLA         |       |
|                                   | (Raehl, Bond, Woods, Patry, & Sleeper, 2006); Elderly | Positive | Fair; cross sectional, n=57, REALM           |       |
|                                   | (Kalichman et al., 2008); HIV                         | Positive | Fair; prospective, n=145, TOFHLA reading     |       |
|                                   | (Paasche-Orlow et al., 2006); HIV                     | No       | Fair; retrospective cohort, n=235, REALM     |       |

|                                                                                            |          |                                                  |
|--------------------------------------------------------------------------------------------|----------|--------------------------------------------------|
| (Wolf, Davis, et al., 2007); Positive HIV                                                  |          | Fair; cross sectional, n=204, REALM              |
| (Gazmararian et al., 2006); No CVD                                                         |          | Fair; prospective cohort, n=1549, s-TOPHLA       |
| (Osborn, Paasche-Orlow, Davis, & Wolf, 2007); HIV                                          | Positive | Fair; cross sectional, n=204, REALM              |
| (Waite, Paasche-Orlow, Rintamaki, Davis, & Wolf, 2008); HIV                                | Positive | Fair; cross sectional, n=204, REALM              |
| (Gatti, Jacobson, K. L., Gazmararian, J. A., Schmotzer, & Kripalani, 2009); urban hospital | No       | Fair; cross sectional, n=275, REALM              |
| (Graham, Bennett, Holmes, & Gross, 2007); HIV                                              | Positive | Fair; retrospective cohort, n=87, REALM          |
| (Gerber, Cho, Arozullah, & Lee, 2010); Elderly                                             | No       | Fair; cross sectional, n=489, s-TOPHLA           |
| (Osborn et al., 2010); diabetes                                                            | No       | Fair; cross-sectional, n=125, REALM              |
| (Bauer et al., 2013); diabetes                                                             | Positive | Good; prospective, n=1366, 3 self-reported items |
| (Kripalani, Gatti, & Jacobson, 2010); CVD                                                  | Positive | Fair; cross sectional, n=434, REALM              |

|                                                             |          |                                        |
|-------------------------------------------------------------|----------|----------------------------------------|
| (Heinrich & Kuiper, 2012); No chronic patients in community |          | Fair; cross sectional, n=36, NVS       |
| (Y.-M. Lee, Yu, You, & Son, 2015); Elderly                  | Positive | Fair; cross sectional, n=291, s-TOFHLA |
| (Pellowski et al., 2016); HIV                               | Positive | Good; prospective, n=188, TOFHLA       |

Preventive health behaviors (e.g., vaccinations, cancer screen, physical activity, self-care, appointment keeping)

10/15

|                                                        |                                          |                                         |
|--------------------------------------------------------|------------------------------------------|-----------------------------------------|
| (Scott, Gazmararian, Williams, & Baker, 2002); Elderly | Positive                                 | Good; cross sectional, n=2722, s-TOFHLA |
| (Williams, Baker, Honig, Lee, & Nowlan, 1998); Asthma  | Positive                                 | Good; cross sectional, n=483, s-TOFHLA  |
| Cho et al., 2008; Elderly                              | Positive                                 | Fair; cross sectional, n=489, s-TOFHLA  |
| (I. Bennett & Chen, 2009); Elderly                     | Positive in some behaviors; no in others | Good; cross sectional, n=2668, NAAL     |

|                                               |                                   |                                                                                  |
|-----------------------------------------------|-----------------------------------|----------------------------------------------------------------------------------|
| (White, Chen, & Atchison, 2008); Elderly      | Positive only among the elderly   | Fair; cross sectional, n=18100, NAAL                                             |
| (Sudore, Mehta, et al., 2006); Elderly        | Positive                          | Fair, cross sectional, n=2512, REALM                                             |
| (Lindau, Basu, & Leitsch, 2006); abnormal Pap | No                                | Fair, cohort; n=68, REALM                                                        |
| (Wolf, Gazmararian, & Baker, 2007); Elderly   | No                                | Fair; cross sectional, n=2923, s-TOFHLA                                          |
| (Osborn et al., 2010); diabetes               | No                                | Fair; cross-sectional, n=125, REALM                                              |
| (Brega et al., 2012); Diabetes                | Mixed                             | Fair; retrospective, n=594, 3 self-reported items                                |
| (Cajita et al., 2016); heart transplantation  | No (except for physical activity) | Fair; cross sectional, n=1362, 1 self-report item                                |
| (Eckman et al., 2012); CAD                    | No                                | Fair; cross sectional, n=187, REALM                                              |
| (Hahn et al., 2015); diabetes                 | No                                | Fair; cross sectional, n=295, Health LiTT                                        |
| (Lai et al., 2013); diabetes                  | Positive                          | Fair; cross sectional, n=63, 5 self-reported items                               |
| (Lee et al., 2016); diabetes                  | Positive                          | Fair; cross sectional, n=459, self-constructed health literacy scale in Japanese |

|                                              |                                                          |          |                                                            |      |
|----------------------------------------------|----------------------------------------------------------|----------|------------------------------------------------------------|------|
|                                              | (Miller-Maturo et al., 2016); transplantation            | Positive | Fair; retrospective cohort, n=398, REALM                   |      |
| <b>Health care services outcomes</b>         |                                                          |          |                                                            |      |
| <i>Emergency Care and/or hospitalization</i> | (Baker et al., 2004); older adults                       | Negative | Good; cohort, n=3260, s-TOFHLA                             | 8/11 |
|                                              | (Murray et al., 2009); CHD                               | Negative | Fair; prospective cohort, n=186, s-TOFHLA                  |      |
|                                              | (Paasche-Orlow et al., 2005); Asthma                     | Negative | Fair; prospective cohort, n=73, s-TOFHLA                   |      |
|                                              | (Tang et al., 2008); Diabetes                            | Negative | Fair; cross sectional, N=149, s-TOFHLA                     |      |
|                                              | (Gordon et al., 2002); Rheumatoid arthritis              | Negative | Fair; cross sectional, n=123, REALM                        |      |
|                                              | (Baker et al., 1998); Elderly                            | Negative | Good; cross sectional, n=3260, s-TOFHLA                    |      |
|                                              | (Murphy et al., 2010); HIV                               | No       | Fair; cross sectional, n=186, s-TOFHLA                     |      |
|                                              | (Hope, Wu, Tu, Young, & Murray, 2004); CVD               | Negative | Fair; Cohort, n=61, medication-specific behavioral measure |      |
|                                              | (Jain et al., 2015); peritoneal dialysis (renal disease) | No       | Fair; prospective cohort, n=32, REALM                      |      |

|                                    |                                                        |          |                                                     |     |
|------------------------------------|--------------------------------------------------------|----------|-----------------------------------------------------|-----|
|                                    | (Puente-Maestu et al., 2016); COPD                     | Negative | Good; prospective cohort, n=296, SAHLSA             |     |
|                                    | (Scarpato et al., 2016); cystectomy                    | No       | Fair; cross sectional, n=368, 3 self-reported items |     |
| <i>Referral to transplantation</i> | (Grubbs, Gregorich, Perez-Stable, & Hsu, 2009); kidney | Positive | Fair; retrospective cohort, n=62, s-TOFHLA          | 1/1 |
