# Supplementary material for: Association Between Health Literacy, eHealth Literacy, and Health Outcomes Among Patients With Long-Term Conditions
Source: Atypon-hosted journal article supplement (doi:10.1027/1016-9040/a000350), 2019-01-01
Supplement: 1016-9040_a000350_esm2.pdf [file 1016-9040_a000350_esm2.pdf]

## ESM2

### List of studies included in the review

- Al Sayah, F., Majumdar, S. R., Egede, L. E., Johnson, J. A., Sayah, F. Al, Majumdar, S. R., ... Johnson, J. A. (2015). Associations between health literacy and health outcomes in a predominantly low-income african american population with type 2 diabetes. *Journal of Health Communication, 20*(5), 581–588.  
<http://doi.org/10.1080/10810730.2015.1012235>
- Al Sayah, F., Majumdar, S. R., & Johnson, J. A. (2015). Association of Inadequate Health Literacy with Health Outcomes in Patients with Type 2 Diabetes and Depression: Secondary Analysis of a Controlled Trial. *Canadian Journal of Diabetes, 39*(4), 259–265.  
<http://doi.org/http://dx.doi.org/10.1016/j.jcjd.2014.11.005>
- Baker, D. W., Gazmararian, J. A., Williams, M. V., Scott, T., Parker, R. M., Green, D., ... Peel, J. (2004). Health Literacy and Use of Outpatient Physician Services by Medicare Managed Care Enrollees. *Journal of General Internal Medicine, 19*(3), 215–220. <http://doi.org/10.1111/j.1525-1497.2004.21130.x>
- Baker, D. W., Parker, R. M., Williams, M. V, & Clark, W. S. (1998). Health literacy and the risk of hospital admission. *Journal of General Internal Medicine, 13*(12), 791–8. <http://doi.org/10.1046/j.1525-1497.1998.00242.x>
- Baker, D. W., Wolf, M., Feinglass, J., Thompson, J., Gazmararian, J., Huang, J., ... Huang, J. (2007). Health literacy and mortality among elderly persons. *Arch Intern Med, 167*(14), 1503–1509. <http://doi.org/10.1001/archinte.167.14.1503>
- Baker, D. W., Wolf, M. S., Feinglass, J., & Thompson, J. A. (2008). Health literacy, cognitive abilities, and mortality among elderly persons. *Journal of General Internal Medicine, 23*(6), 723–726. <http://doi.org/10.1007/s11606-008-0566-4>

- Bauer, A. M., Schillinger, D., Parker, M. M., Katon, W., Adler, N., Adams, A. S., ... Karter, A. J. (2013). Health literacy and antidepressant medication adherence among adults with diabetes: The diabetes study of northern california (DISTANCE). *Journal of General Internal Medicine*, 28(9), 1181–1187. <http://doi.org/10.1007/s11606-013-2402-8>
- Bennett, C. L., Ferreira, M. R., Davis, T. C., Kaplan, J., Weinberger, M., Kuzel, T., ... Sartor, O. (1998). Relation between literacy, race, and stage of presentation among low- income patients with prostate cancer. *Journal of Clinical Oncology*, 16(9), 3101–3104. <http://doi.org/10.1200/jco.1998.16.9.3101>
- Bennett, I., & Chen, J. (2009). The contribution of health literacy to disparities in self-rated health status and preventive health behaviors in older adults. *The Annals of Family Medicine*, 7(3), 204–211. <http://doi.org/10.1370/afm.940>. Department
- Blackstock, O. J., Cunningham, C. O., Haughton, L. J., Garner, R. Y., Norwood, C., & Horvath, K. J. (2016). Higher eHealth Literacy is Associated With HIV Risk Behaviors among HIV-Infected Women Who Use the Internet. *JANAC- JOURNAL OF THE ASSOCIATION OF NURSES IN AIDS CARE*, 27(1), 102–108. <http://doi.org/10.1016/j.jana.2015.09.001>
- Brega, A. G., Ang, A., Vega, W., Jiang, L., Beals, J., Mitchell, C. M., ... Roubideaux, Y. (2012). Mechanisms underlying the relationship between health literacy and glycemic control in American Indians and Alaska Natives. *Patient Education and Counseling*, 88(1), 61–68. <http://doi.org/10.1016/j.pec.2012.03.008>
- Britt, R. K., Collins, W. B., Wilson, K. M., Linnemeier, G., & Englebert, A. M. (2015). The Role of eHealth Literacy and HPV Vaccination Among Young Adults: Implications from a Planned Behavior Approach. *Communication Research Reports*, 32(3), 208–215.

<http://doi.org/10.1080/08824096.2015.1052963>

Cajita, M. I., Denhaerynck, K., Dobbels, F., Berben, L., Russell, C. L., Davidson, P. M., & Geest, S. De. (2016). Health literacy in heart transplantation: Prevalence, correlates and associations with health behaviors—Findings from the international BRIGHT study. *The Journal of Heart and Lung Transplantation*. <http://doi.org/http://dx.doi.org/10.1016/j.healun.2016.08.024>

Cho, Y. I., Lee, S.-Y. Y. D. Y., Arozullah, A. M., & Crittenden, K. S. (2008). Effects of health literacy on health status and health service utilization amongst the elderly. *Social Science & Medicine (1982)*, *66*(8), 1809–16. <http://doi.org/10.1016/j.socscimed.2008.01.003>

Devraj, R., Borrego, M., Vilay, A. M., Gordon, E. J., Pailden, J., & Horowitz, B. (2015). Relationship between Health Literacy and Kidney Function. *Nephrology*, *20*(5), 360–367. <http://doi.org/10.1111/nep.12425>

Eckman, M. H., Wise, R., Leonard, A. C., Dixon, E., Burrows, C., Khan, F., & Warm, E. (2012). Impact of health literacy on outcomes and effectiveness of an educational intervention in patients with chronic diseases. *Patient Education and Counseling*, *87*(2), 143–151. <http://doi.org/10.1016/j.pec.2011.07.020>

Estrada, C. a, Martin-Hryniewicz, M., Peek, B. T., Collins, C., & Byrd, J. C. (2004). Literacy and numeracy skills and anticoagulation control. *The American Journal of the Medical Sciences*, *328*(2), 88–93. <http://doi.org/10.1097/00000441-200408000-00004>

Fang, M. C., Machtiger, E. L., Wang, F., & Schillinger, D. (2006). Health literacy and anticoagulation-related outcomes among patients taking warfarin. *Journal of General Internal Medicine*, *21*(8), 841–846. <http://doi.org/10.1111/j.1525-1497.2006.00537.x>

- Gatti, M. E., Jacobson, K. L., Gazmararian, J. A., Schmotzer, B., & Kripalani, S. (2009). Relationships between beliefs about medications and adherence. *Journal of Health-System Pharmacy*, 66(7).
- Gazmararian, J. A., Kripalani, S., Miller, M. J., Echt, K. V., Ren, J., & Kimberly Rask. (2006). Factors associated with medication refill adherence in cardiovascular-related diseases. *Journal of General Internal Medicine*, 21(12), 1215–1221. <http://doi.org/10.1111/j.1525-1497.2006.00591.x>
- Gazmararian, J., Baker, D. W., Parker, R. M., & Blazer, D. G. (2000). A Multivariate Analysis of Factors Associated With Depression. *Archives of Internal Medicine*, 160(21), 3307. <http://doi.org/10.1001/archinte.160.21.3307>
- Gerber, B. S., Cho, Y. I., Arozullah, A. M., & Lee, S. Y. D. (2010). Racial differences in medication adherence: A cross-sectional study of medicare enrollees. *American Journal Geriatric Pharmacotherapy*, 8(2), 136–145. <http://doi.org/10.1016/j.amjopharm.2010.03.002>
- Gordon, M.-M., Hampson, R., Capell, H. a., & Madhok, R. (2002). Illiteracy in rheumatoid arthritis patients as determined by the Rapid Estimate of Adult Literacy in Medicine (REALM) score. *Rheumatology*, 41(7), 750–4. <http://doi.org/10.1093/rheumatology/41.7.750>
- Graham, J., Bennett, I. M., Holmes, W. C., & Gross, R. (2007). Medication beliefs as mediators of the health literacy - Antiretroviral adherence relationship in HIV-infected individuals. *AIDS and Behavior*, 11(3), 385–392. <http://doi.org/10.1007/s10461-006-9164-9>
- Grubbs, V., Gregorich, S. E., Perez-Stable, E. J., & Hsu, C. Y. (2009). Health literacy and access to kidney transplantation. *Clinical Journal of the American Society of Nephrology*, 4(1), 195–200. <http://doi.org/10.2215/CJN.03290708>

- Hahn, E. A., Burns, J. L., Jacobs, E. A., Ganschow, P. S., Garcia, S. F., Rutsohn, J. P., & Baker, D. W. (2015). Health Literacy and Patient-Reported Outcomes: A Cross-Sectional Study of Underserved English- and Spanish-Speaking Patients With Type 2 Diabetes. *Journal of Health Communication, 20*(Supplement 2), 4–15. <http://doi.org/10.1080/10810730.2015.1061071>
- Hahn, E. A., Cella, D., Dobrez, D. G., Weiss, B. D., Du, H., Lai, J. S., ... Garcia, S. F. (2007). The impact of literacy on health-related quality of life measurement and outcomes in cancer outpatients. *Quality of Life Research, 16*(3), 495–507. <http://doi.org/10.1007/s11136-006-9128-6>
- Halladay, J. R., Donahue, K. E., Cené, C. W., Li, Q., Cummings, D. M., Hinderliter, A. L., ... DeWalt, D. (2016). The association of health literacy and blood pressure reduction in a cohort of patients with hypertension: The heart healthy lenoir trial. *Patient Education and Counseling*. <http://doi.org/http://dx.doi.org/10.1016/j.pec.2016.10.015>
- Halverson, J., Martinez-Donate, A., Trentham-Dietz, A., Walsh, M. C., Strickland, J. S., Palta, M., ... Cleary, J. (2013). Health literacy and urbanicity among cancer patients. *The Journal of Rural Health, 29*(4), 392–402.
- Heinrich, C., & Kuiper, R. A. (2012). Using Handheld Devices to Promote Medication Adherence in Chronic Illness. *The Journal for Nurse Practitioners, 8*(4), 288–293. <http://doi.org/http://dx.doi.org/10.1016/j.nurpra.2011.10.010>
- Hope, C. J., Wu, J., Tu, W., Young, J., & Murray, M. D. (2004). Association of medication adherence, knowledge, and skills with emergency department visits by adults 50 years or older with congestive heart failure. *American Journal of Health-System Pharmacy, 61*(19), 2043–2049. Retrieved from <http://www.ajhp.org/content/61/19/2043.short>

- Howard, D. H., Sentell, T., & Gazmararian, J. a. (2006). Impact of health literacy on socioeconomic and racial differences in health in an elderly population. *Journal of General Intern Medicine, 21*, 857–861. <http://doi.org/10.1111/j.1525-1497.2006.00530.x>
- Hsu, W., Chiang, C., & Yang, S. (2014). The effect of individual factors on health behaviors among college students: the mediating effects of eHealth literacy. *Journal of Medical Internet Research, 16*(12), e287. <http://doi.org/10.2196/jmir.3542>
- Ishikawa, H., & Yano, E. (2011). The relationship of patient participation and diabetes outcomes for patients with high vs. low health literacy. *Patient Education and Counseling, 84*(3), 393–397. <http://doi.org/10.1016/j.pec.2011.01.029>
- Jain, D., Sheth, H., Green, J. A., Bender, F. H., & Weisbord, S. D. (2015). Health Literacy in Patients on Maintenance Peritoneal Dialysis: Prevalence and Outcomes. *Peritoneal Dialysis International, 35*(1), 96–98. <http://doi.org/10.3747/pdi.2013.00342>
- Johnston, M. V, Diab, M. E., Kim, S.-S., & Kirshblum, S. (2005). Health literacy, morbidity, and quality of life among individuals with spinal cord injury. *The Journal Of Spinal Cord Medicine, 28*(3), 230–240. Retrieved from <http://search.ebscohost.com/login.aspx?direct=true&db=mnh&AN=16048141&site=ehost-live&scope=site>
- Kalichman, S. C., Benotsch, E., Suarez, T., Catz, S., Miller, J., & Rompa, D. (2000). Health literacy and health-related knowledge among persons living with HIV/AIDS. *American Journal of Preventive Medicine, 18*(4), 325–331. [http://doi.org/10.1016/S0749-3797\(00\)00121-5](http://doi.org/10.1016/S0749-3797(00)00121-5)

- Kalichman, S. C., Pope, H., White, D., Cherry, C., Amaral, C. M., Swetzes, C., ...  
Kalichman, M. O. (2008). Association between health literacy and HIV treatment adherence: further evidence from objectively measured medication adherence. *Journal of the International Association of Physicians in AIDS Care (Chicago, Ill. : 2002)*, 7(6), 317–23. <http://doi.org/10.1177/1545109708328130>
- Kalichman, S. C., Ramachandran, B., & Catz, S. (1999). Adherence to combination antiretroviral therapies in HIV patients of low health literacy. *Journal of General Internal Medicine*, 14(5), 267–273. <http://doi.org/10.1046/j.1525-1497.1999.00334.x>
- Kalichman, S. C., & Rompa, D. (2000). Emotional Reactions to Health Status Changes and Emotional Well-Being Among HIV-Positive Persons with Limited Reading Literacy. *Journal of Clinical Psychology in Medical Settings*, 7(4), 203–211.
- Kim, S. H. (2009). Health literacy and functional health status in Korean older adults. *Journal of Clinical Nursing*, 18(16), 2337–2343. <http://doi.org/10.1111/j.1365-2702.2008.02739.x>
- Kripalani, S., Gatti, M. E., & Jacobson, T. A. (2010). Association of age, health literacy, and medication management strategies with cardiovascular medication adherence. *Patient Education and Counseling*, 81(2), 177–181. <http://doi.org/10.1016/j.pec.2010.04.030>
- Kripalani, S., Henderson, L. E., Chiu, E. Y., Robertson, R., Kolm, P., & Jacobson, T. A. (2006). Predictors of medication self-management skill in a low-literacy population. *Journal of General Internal Medicine*, 21(8), 852–856. <http://doi.org/10.1111/j.1525-1497.2006.00536.x>
- Lai, A. Y., Ishikawa, H., Kiuchi, T., Mooppil, N., & Griva, K. (2013).

- Communicative and critical health literacy, and self-management behaviors in end-stage renal disease patients with diabetes on hemodialysis. *Patient Education and Counseling*, 91(2), 221–227.  
<http://doi.org/10.1016/j.pec.2012.12.018>
- Lee, E.-H., Lee, Y. W., & Moon, S. H. (2016). A Structural Equation Model Linking Health Literacy to Self-efficacy, Self-care Activities, and Health-related Quality of Life in Patients with Type 2 Diabetes. *Asian Nursing Research*, 10(1), 82–87.  
<http://doi.org/http://dx.doi.org/10.1016/j.anr.2016.01.005>
- Lee, S.-Y. D., Arozullah, A. M., Cho, Y. I., Crittenden, K., & Vicencio, D. (2009). Health Literacy, Social Support, and Health Status Among Older Adults. *Educ Gerontol*, 35(3), 191–201. <http://doi.org/10.1080/03601270802466629>
- Lee, Y.-M., Yu, H. Y., You, M.-A., & Son, Y.-J. (2015). Impact of health literacy on medication adherence in older people with chronic diseases. *Collegian*, 24(1), 1–8. <http://doi.org/10.1016/j.colegn.2015.08.003>
- Lincoln, A., Paasche-Orlow, M. K., Cheng, D. M., Lloyd-Travaglini, C., Caruso, C., Saitz, R., & Samet, J. H. (2006). Impact of health literacy on depressive symptoms and mental health-related quality of life among adults with addiction. *Journal of General Internal Medicine*, 21(8), 818–822.  
<http://doi.org/10.1111/j.1525-1497.2006.00533.x>
- Lindau, S. T., Basu, A., & Leitsch, S. A. (2006). Health literacy as a predictor of follow-up after an abnormal pap smear: A prospective study. *Journal of General Internal Medicine*, 21(8), 829–834. <http://doi.org/10.1111/j.1525-1497.2006.00534.x>
- Mancuso, C. A., & Rincon, M. (2006). Impact of health literacy on longitudinal asthma outcomes. *Journal of General Internal Medicine*, 21(8), 813–817.



<http://doi.org/10.1111/j.1525-1497.2006.00528.x>

Mancuso, J. M. (2010). Impact of health literacy and patient trust on glycemic control in an urban USA population. *Nursing and Health Sciences*, 12(1), 94–104.

<http://doi.org/10.1111/j.1442-2018.2009.00506.x>

Mayben, J. K., Kramer, J. R., Kallen, M. a, Franzini, L., Lairson, D. R., & Giordano, T. P. (2007). Predictors of delayed HIV diagnosis in a recently diagnosed cohort.

*AIDS Patient Care STDS*, 21(3), 195–204. <http://doi.org/10.1089/apc.2006.0097>

Miller-Matero, L. R., Bryce, K., Hyde-Nolan, M. E., Dykhuis, K. E., Eshelman, A., & Abouljoud, M. (2016). Health Literacy Status Affects Outcomes for Patients

Referred for Transplant. *Psychosomatics*, 57(5), 522–528.

<http://doi.org/10.1016/j.psych.2016.04.001>

Milne, R. A., Puts, M. T. E., Papadakos, J., Le, L. W., Milne, V. C., Hope, A. J., ...

Pignone, M. P. (2012). Predictors of High eHealth Literacy in Primary Lung Cancer Survivors. *BMC Health Services Research*, 30(4), 685–692.

<http://doi.org/10.1007/s13187-014-0744-5>

Mitsutake, S., Shibata, A., Ishii, K., & Oka, K. (2012). Association of eHealth Literacy With Colorectal Cancer Knowledge and Screening Practice Among

Internet Users in Japan. *JOURNAL OF MEDICAL INTERNET RESEARCH*, 14(6), 406–416. <http://doi.org/10.2196/jmir.1927>

Mitsutake, S., Shibata, A., Ishii, K., & Oka, K. (2016). Associations of eHealth

Literacy With Health Behavior Among Adult Internet Users. *Journal of Medical Internet Research*, 18(7), e192. <http://doi.org/10.2196/jmir.5413>

Morris, N. S., MacLean, C. D., & Littenberg, B. (2006). Literacy and health

outcomes: a cross-sectional study in 1002 adults with diabetes. *BMC Family Practice*, 7(April 2017), 49. <http://doi.org/10.1186/1471-2296-7-49>

- Muir, K. W., Santiago-Turla, C., Stinnett, S. S., Herndon, L. W., Allingham, R. R., Challa, P., & Lee, P. P. (2008). Health literacy and vision-related quality of life. *The British Journal of Ophthalmology*, *92*(6), 779–782.  
<http://doi.org/10.1136/bjo.2007.134452>
- Murphy, D. A., Lam, P., Naar-King, S., Robert Harris, D., Parsons, J. T., Muenz, L. R., ... Muenz, L. R. (2010). Health Literacy and Antiretroviral Adherence Among HIV-infected Adolescents. *Patient Education and Counseling*, *144*(1), 25–29. <http://doi.org/10.1016/j.pec.2009.07.014>
- Murray, M. D., Tu, W., Wu, J., Morrow, D., Smith, F., & Brater, D. C. (2009). Factors associated with exacerbation of heart failure include treatment adherence and health literacy skills. *Clinical Pharmacology and Therapeutics*, *85*(6), 651–8. <http://doi.org/10.1038/clpt.2009.7>
- Neter, E., & Brainin, E. (2012). eHealth Literacy: Extending the Digital Divide to the Realm of Health Information. *Journal of Medical Internet Research*, *14*(1), e19. <http://doi.org/10.2196/jmir.1619>
- Nokes, K. M., Coleman, C. L., Cashen, M., Dole, P., Sefcik, E., Hamilton, M. J., ... Holzemer, W. (2007). Health literacy and health outcomes in HIV seropositive persons. *Research in Nursing and Health*, *30*(6), 620–627.  
<http://doi.org/10.1002/nur.20219>
- Oramasionwu, C. U., Bailey, S. C., Duffey, K. E., Shilliday, B. B., Brown, L. C., Denslow, S. A., & Michalets, E. L. (2014). The association of health literacy with time in therapeutic range for patients on warfarin therapy. *Journal of Health Communication*, *19 Suppl 2*, 19–28.  
<http://doi.org/10.1080/10810730.2014.934934>
- Osborn, C. Y., Bains, S. S., & Egede, L. E. (2010). Health Literacy, Diabetes Self-

- Care, and Glycemic Control in Adults with Type 2 Diabetes. *Diabetes Technology & Therapeutics*, 12(11), 913–919.  
<http://doi.org/10.1089/dia.2010.0058>
- Osborn, C. Y., Paasche-Orlow, M. K., Davis, T. C., & Wolf, M. S. (2007). Health Literacy. An Overlooked Factor in Understanding HIV Health Disparities. *American Journal of Preventive Medicine*, 33(5), 374–378.  
<http://doi.org/10.1016/j.amepre.2007.07.022>
- Paasche-Orlow, M. K., Cheng, D. M., Palepu, A., Meli, S., Faber, V., & Samet, J. H. (2006). Health literacy, antiretroviral adherence, and HIV-RNA suppression: A longitudinal perspective. *Journal of General Internal Medicine*, 21(8), 835–840.  
<http://doi.org/10.1111/j.1525-1497.2006.00527.x>
- Paasche-Orlow, M. K., Riekert, K. A., Bilderback, A., Chanmugam, A., Hill, P., Rand, C. S., ... Krishnan, J. A. (2005). Tailored education may reduce health literacy disparities in asthma self-management. *American Journal of Respiratory and Critical Care Medicine*, 172(8), 980–986.  
<http://doi.org/10.1164/rccm.200409-1291OC>
- Pandit, A. U., Tang, J. W., Bailey, S. C., Davis, T. C., Bocchini, M. V., Persell, S. D., ... Wolf, M. S. (2009). Education, literacy, and health: Mediating effects on hypertension knowledge and control. *Patient Education and Counseling*, 75(3), 381–385. <http://doi.org/10.1016/j.pec.2009.04.006>
- Pellowski, J. A., Kalichman, S. C., & Grebler, T. (2016). Optimal Treatment Adherence Counseling Outcomes for People Living with HIV and Limited Health Literacy. *Behavioral Medicine (Washington, D.C.)*, 4289(May), 1–9.  
<http://doi.org/10.1080/08964289.2014.963006>
- Powell, C. K., Hill, E. G., & Clancy, D. E. (2007). The relationship between health

- literacy and diabetes knowledge and readiness to take health actions. *The Diabetes Educator*, 33(1), 144–151. <http://doi.org/10.1177/0145721706297452>
- Puente-Maestu, L., Calle, M., Rodríguez-Hermosa, J. L., Campuzano, A., de Miguel Díez, J., Álvarez-Sala, J. L., ... Lee, S.-Y. D. (2016). Health literacy and health outcomes in chronic obstructive pulmonary disease. *Respiratory Medicine*, 115, 78–82. <http://doi.org/http://dx.doi.org/10.1016/j.rmed.2016.04.016>
- Raehl, C. L. ., Bond, C., Woods, T. J., Patry, R. A., & Sleeper, R. B. (2006). Screening Tests for Intended Medication Adherence Among the Elderly. *The Annals of Pharmacotherapy*, 7(4), 485–503. <http://doi.org/10.1345/aph.1G478>
- Scarpato, K. R., Kappa, S. F., Goggins, K. M., Chang, S. S., Smith, J. A., Clark, P. E., ... Moses, K. A. (2016). The Impact of Health Literacy on Surgical Outcomes Following Radical Cystectomy. *Journal of Health Communication*, 21(sup2), 99–104. <http://doi.org/10.1080/10810730.2016.1193916>
- Schillinger, D., Barton, L. R., Karter, A. J., Wang, F., & Adler, N. (2006). Does Literacy Mediate the Relationship Between Education and Health Outcomes? A Study of a Low-Income Population with Diabetes. *Public Health Reports*, 121(3), 245–254. <http://doi.org/10.1177/003335490612100305>
- Schillinger, D., Grumbach, K., Piette, J., Wang, F., Osmond, D., Daher, C., ... Bindman, A. B. (2002). Association of Health Literacy With Diabetes Outcomes. *Journal of American Medical Association*, 288(4), 475–482. <http://doi.org/10.1001/jama.288.4.475>
- Scott, T. L., Gazmararian, J. A., Williams, M. V., & Baker, D. W. (2002). Health literacy and preventive health care use among Medicare enrollees in a managed care organization. *Medical Care*, 40(5), 395–404. <http://doi.org/10.1097/00005650-200205000-00005>

Serper, M., Patzer, R. E., Curtis, L. M., Smith, S. G., O'Connor, R., Baker, D. W., & Wolf, M. S. (2014). Health literacy, cognitive ability, and functional health status among older adults. *Health Services Research, 49*(4), 1249–1267.

<http://doi.org/10.1111/1475-6773.12154>

Smith, S. G., Curtis, L. M., Wardle, J., von Wagner, C., & Wolf, M. S. (2013). Skill set or mind set? Associations between health literacy, patient activation and health. *PLoS ONE, 8*(9). <http://doi.org/10.1371/journal.pone.0074373>

Sperber, N. R., Bosworth, H. B., Coffman, C. J., Lindquist, J. H., Oddone, E. Z., Weinberger, M., & Allen, K. D. (2013). Differences in osteoarthritis self-management support intervention outcomes according to race and health literacy. *Health Education Research, 28*(3), 502–511. <http://doi.org/10.1093/her/cyt043>

Sudore, R. L., Mehta, K. M., Simonsick, E. M., Harris, T. B., Newman, A. B., Satterfield, S., ... Yaffe, K. (2006). Limited literacy in older people and disparities in health and healthcare access. *Journal of the American Geriatrics Society, 54*(5), 770–776. <http://doi.org/10.1111/j.1532-5415.2006.00691.x>

Sudore, R. L., Yaffe, K., Satterfield, S., Harris, T. B., Mehta, K. M., Simonsick, E. M., ... Schillinger, D. (2006). Limited literacy and mortality in the elderly: The health, aging, and body composition study. *Journal of General Internal Medicine, 21*(8), 806–812. <http://doi.org/10.1111/j.1525-1497.2006.00539.x>

Tang, Y. H., Pang, S. M. C., Chan, M. F., Yeung, G. S. P., & Yeung, V. T. F. (2008). Health literacy, complication awareness, and diabetic control in patients with type 2 diabetes mellitus. *Journal of Advanced Nursing, 62*(1), 74–83. <http://doi.org/10.1111/j.1365-2648.2007.04526.x>

Waite, K. R., Paasche-Orlow, M., Rintamaki, L. S., Davis, T. C., & Wolf, M. S. (2008). Literacy, social stigma, and HIV medication adherence. *Journal of*

- General Internal Medicine*, 23(9), 1367–1372. <http://doi.org/10.1007/s11606-008-0662-5>
- Waldrop-Valverde, D., Jones, D. L., Jayaweera, D., Gonzalez, P., Romero, J., & Ownby, R. L. (2009). Gender differences in medication management capacity in HIV infection: The role of health literacy and numeracy. *AIDS and Behavior*, 13(1), 46–52. <http://doi.org/10.1007/s10461-008-9425-x>
- Walker, D., Adebajo, A., Heslop, P., Hill, J., Firth, J., Bishop, P., & Helliwell, P. S. (2007). Patient education in rheumatoid arthritis: The effectiveness of the ARC booklet and the mind map. *Rheumatology*, 46(10), 1593–1596. <http://doi.org/10.1093/rheumatology/kem171>
- White, S., Chen, J., & Atchison, R. (2010). Relationship of preventive health practices and health literacy: a national study. *American Journal of Health Behavior*, 32(3), 227–42. <http://doi.org/10.5555/ajhb.2008.32.3.227>
- Williams, M. V., Baker, D. W., Honig, E. G., Lee, T. M., & Nowlan, A. (1998). Inadequate literacy is a barrier to asthma knowledge and self-care. *Chest*, 114(4), 1008–1015. <http://doi.org/10.1378/chest.114.4.1008>
- Wolf, M. S., Davis, T. C., Osborn, C. Y., Skripkauskas, S., Bennett, C. L., & Makoul, G. (2007). Literacy, self-efficacy, and HIV medication adherence. *Patient Education and Counseling*, 65(2), 253–260. <http://doi.org/10.1016/j.pec.2006.08.006>
- Wolf, M. S., Gazmararian, J. A., & Baker, D. W. (2005). Health literacy and functional health status among older adults, 165(17), 1946–1952. <http://doi.org/10.1001/archinte.165.17.1946>
- Wolf, M. S., Gazmararian, J. A., & Baker, D. W. (2007). Health Literacy and Health Risk Behaviors Among Older Adults. *American Journal of Preventive Medicine*,

32(1), 19–24. <http://doi.org/10.1016/j.amepre.2006.08.024>

Xie, B. (2011). Effects of an eHealth literacy intervention for older adults. *Journal of Medical Internet Research*, 13(4), e90. <http://doi.org/10.2196/jmir.1880>

Zhang, X.-H., Li, S.-C., Fong, K.-Y., & Thumboo, J. (2009). The impact of health literacy on health-related quality of life (HRQoL) and utility assessment among patients with rheumatic diseases. *Value in Health : The Journal of the International Society for Pharmacoeconomics and Outcomes Research*, 12 Suppl 3, S106-9. <http://doi.org/10.1111/j.1524-4733.2009.00640.x>
